# Supplementary material for: Microbial conversion pathways of particulate organic substrate conversion in aerobic granular sludge systems: limited anaerobic conversion and the essential role of flocs
Source: Royal Society of Chemistry journal article supplement (doi:10.1039/d1ew00841b), 2022-01-01
Supplement: d1ew00841b1.pdf [file d1ew00841b1.pdf]

1 Microbial utilisation of particulate substrate utilisation during anaerobic plug-flow feeding and aerobic fully-  
2 mixed conditions in aerobic granular sludge operation

3 **Supplementary Information**

4 Manuel Layer<sup>1</sup>, Antoine Brison<sup>1</sup>, Mercedes Garcia Villodres<sup>1</sup>, Eberhard Morgenroth<sup>1,2</sup>, Nicolas Derlon<sup>1</sup>

5 <sup>1</sup> *Eawag: Swiss Federal Institute of Aquatic Science and Technology, Überlandstrasse 133,*  
6 *CH-8600 Dübendorf, Switzerland*

7 <sup>2</sup> *Institute of Environmental Engineering, ETH Zürich, CH-8093 Zürich, Switzerland*

8 Email of the first author: [manuel.layer@eawag.ch](mailto:manuel.layer@eawag.ch)

## 9 S1 Distribution of granules and flocs during AGS-SBR operation

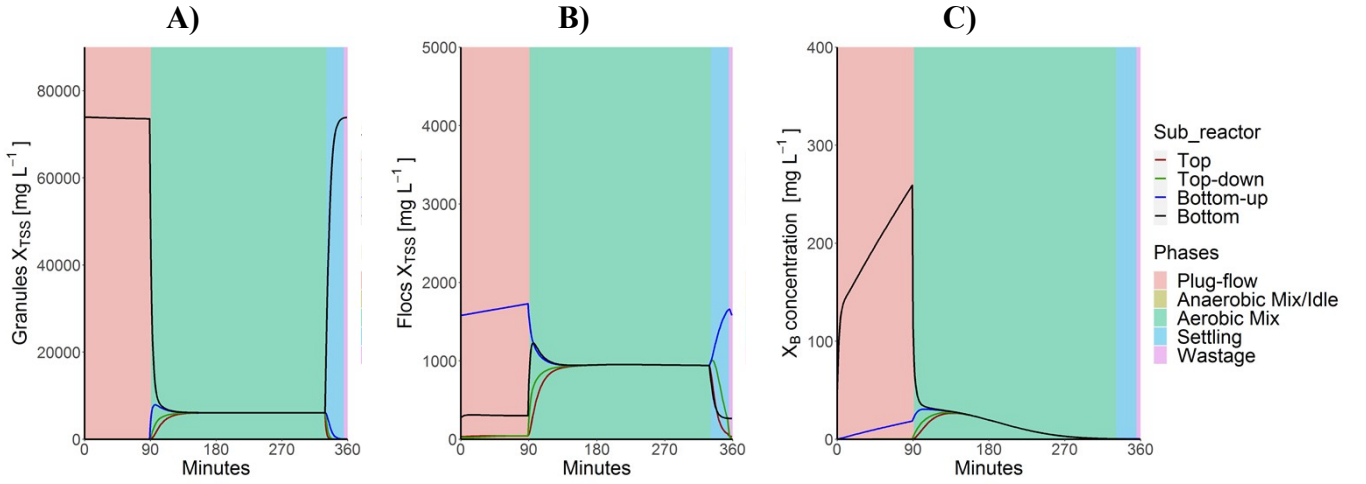

10 **Figure S1:** Distribution of  $X_{TSS}$  of flocs (A) and granules (B), as well as of influent  $X_B$  (C) within  
 11 the four sub-reactors of the AGS model during the different operational phases of the default  
 12 scenario.

## 13 S2 Kinetic model

14 **Table S1:** Kinetic (Gujer) matrix, model parameters and calculated variables of the mathematical  
 15 model “SUMO1\_XBSBSVFASH2\_sep” used in this study. The tables are in “multimedia component  
 16 1”.  
 17

## 18 S3 $S_{VFA}$ storage kinetics of PAO and GAO

$$r_{storage, X_{STO,PAO}}$$

$$= q_{PAO, X_{STO,PAO}} \cdot X_{PAO} \cdot \frac{S_{VFA}}{K_{VFA,PAO} + S_{VFA}} \cdot \frac{\frac{X_{PP}}{X_{PAO}}}{K_{PP} + \frac{X_{PP}}{X_{PAO}}} \cdot \frac{1}{1 + \exp\left[\frac{X_{STO,PAO}}{X_{PAO}} - K_{i, X_{STO,PAO}, PAO, PAOmax}\right]}$$

19  
 20

Equ. S1

$$r_{storage, X_{STO,GAO}}$$

$$= q_{PAO, X_{STO,GAO}} \cdot X_{GAO} \cdot \frac{S_{VFA}}{K_{VFA,GAO} + S_{VFA}} \cdot \frac{1}{1 + \exp\left[\left(\frac{X_{STO,GAO}}{X_{GAO}} - K_{i, X_{STO,GAO}, GAO, GAOmax}\right) * s_2\right]} \cdot \frac{1}{1 + e}$$

21  
 22

Equ. S2

23 where  $q_{PAO, X_{STO,PAO}}$  and  $q_{GAO, X_{STO,GAO}}$  are the maximum rate of  $S_{VFA}$  storage of  $X_{STO,PAO}$  and

24  $X_{STO,GAO}$  by PAO and GAO, respectively (both  $4 \text{ d}^{-1}$ ),  $S_{VFA}$  the VFA concentration ( $\text{g m}^{-3}$ ),

25  $K_{VFA,PAO}$  and  $K_{VFA,GAO}$  the half-saturation of  $S_{VFA}$  storage for PAO and GAO, respectively

26 (both  $5 \text{ g m}^{-3}$ ),  $X_{PP}$  the poly-phosphate concentration ( $\text{g m}^{-3}$ ),  $K_{PP}$  the half-saturation of poly-

27 phosphate for PAO ( $0.01 \text{ gP m}^{-3}$ ),  $K_{i,X_{\text{STO,PAO,PAOmax}}}$  the half-inhibition of maximum  $X_{\text{STO,PAO}}$   
 28 content of PAO ( $0.60 \text{ gCOD gCOD}^{-1}$ ),  $K_{i,X_{\text{STO,GAO,GAOmax}}}$  the half-inhibition of maximum  
 29  $X_{\text{STO,GAO}}$  content of GAO ( $0.50 \text{ gCOD gCOD}^{-1}$ ),  $s_1$  and  $s_2$  the logistic slope of the logistic  
 30 inhibition of GAO and PAO (500), respectively,  $K_{\text{ORP,GAO}}$  the logistic half-saturation of ORP  
 31 switching of GAO (-100 mV), ORP the oxidation reduction potential (mV) and  $s_{\text{ORP,GAO}}$  the  
 32 logistic slope of the ORP switching of GAO (0.1).

33 **S4 Microbial community composition of the default scenario**

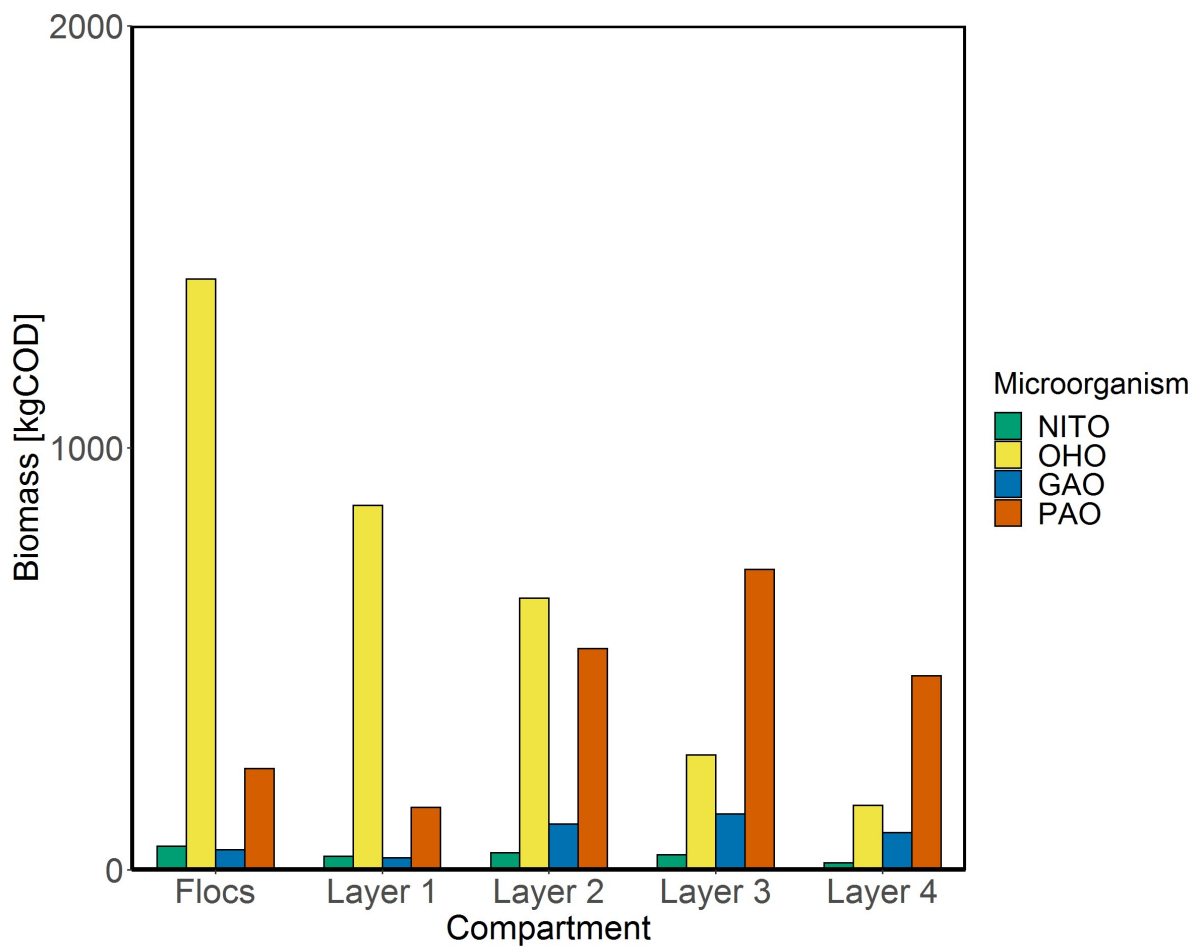

34 **Figure S2:** Microbial composition (nitrifiers (NITRO), OHO, GAO and PAO) of the flocs, and  
 35 granule layers 1-4 of the default scenario.

36
